# Supplementary material for: Synthesis, crystal structure analysis, computational modelling and evaluation of anti-cervical cancer activity of novel 1,5-dicyclooctyl thiocarbohydrazone
Source: Royal Society of Chemistry journal article supplement (doi:10.1039/d4cp02286f), 2024-01-01
Supplement: d4cp02286f1.pdf [file d4cp02286f1.pdf]

## **Synthesis, Crystal Structure Analysis, Computational Modelling and Evaluation of Anti-Cervical Cancer Activity of Novel 1,5-Dicyclooctyl Thiocarbohydrazone**

*Soni Shukla<sup>a</sup>, Prince Trivedi<sup>a</sup>, Delna Johnson<sup>b</sup>, Pulkit Sharma<sup>a</sup>, Abhinav Jha<sup>a</sup>, Habiba Khan<sup>c</sup>,  
Vijay Thiruvengatam<sup>b</sup>, Monisha Banerjee<sup>c</sup>, Abha Bishnoi<sup>a\*</sup>*

<sup>a</sup>Department of Chemistry, University of Lucknow, Lucknow - 226007, Uttar Pradesh, India

<sup>b</sup>Department of Biological Sciences and Engineering, Indian Institute of Technology, Gandhinagar, Palaj -382355, Gandhinagar, India

<sup>c</sup>Department of Zoology, University of Lucknow, Lucknow- 226007, Uttar Pradesh, India

Corresponding Author: Prof. Abha Bishnoi, [Email: abhabishnoi5@gmail.com](mailto:abhabishnoi5@gmail.com), Mobile: 9415028822.

**Supplementary Fig. S1** FT-IR spectrum of compound **3**.

**Supplementary Fig. S2** <sup>1</sup>H-NMR spectrum of compound **3**.

**Supplementary Fig. S3** <sup>13</sup>C-NMR spectrum of compound **3**.

**Supplementary Fig. S4** Plausible reaction mechanism of synthesized compound **3**.

**Supplementary Fig. S5** Colour coding of neighbouring molecules with respect to the central molecule (black colour).

**Supplementary Fig. S6** Optimized structure of compound **3** using DFT/B3LYP/6-311++G (d, p) level of theory.

**Supplementary Fig. S7** Theoretical FT- IR spectrum of compound **3** using DFT/B3LYP/6-311++G (d, p) level of theory.

**Supplementary Fig. S8** <sup>1</sup>H and <sup>13</sup>C NMR correlation diagram of compound **3** using DFT/B3LYP/6-311++G (d, p) level of theory.

**Supplementary Fig. S9** The correlation diagram of UV- Vis spectra of compound **3** using DFT/B3LYP/B3WP91/PBE-PBE/6-311++G (d, p) level of theory.

**Supplementary Fig. S10** The MEP diagram of compound **3** using DFT/B3LYP /6-311++G (d, p) level of theory.

**Supplementary Fig. S11** The Histograms of compound **3** with protein tyrosine-protein phosphatase 4XR8(A) and 7VZE (B) found number of distinct conformational clusters 12 and 10 with binding energies out of 50 runs using a RMSD-tolerance of 2.0 Å.

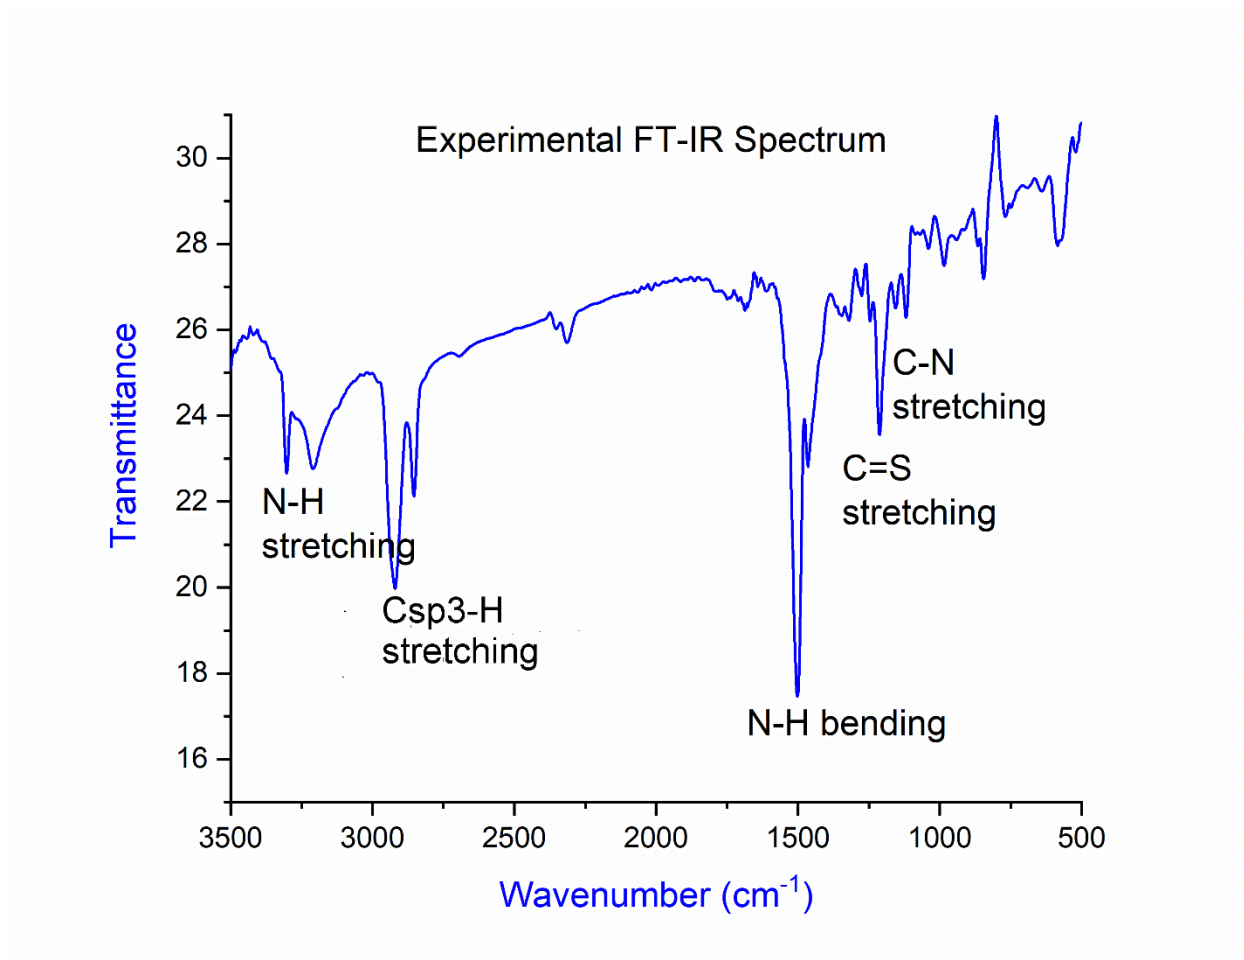

**Supplementary Fig. S1** FT-IR spectrum of compound **3**.

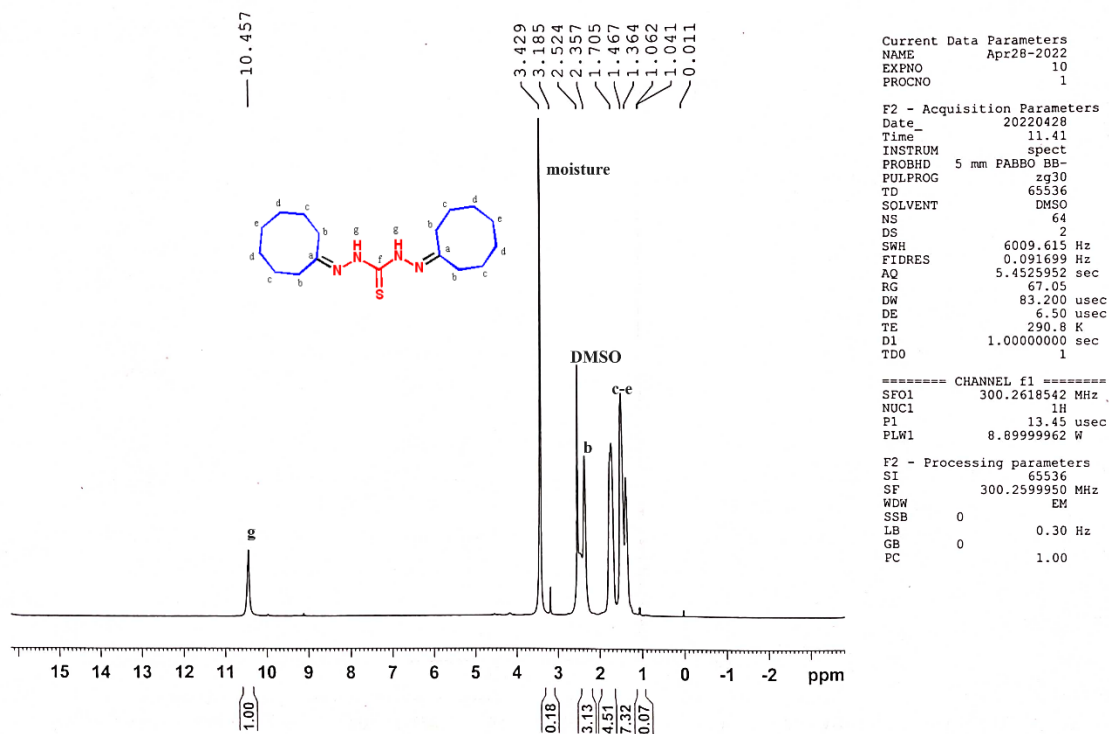

Supplementary Fig. S2  $^1\text{H}$ -NMR spectrum of compound 3.

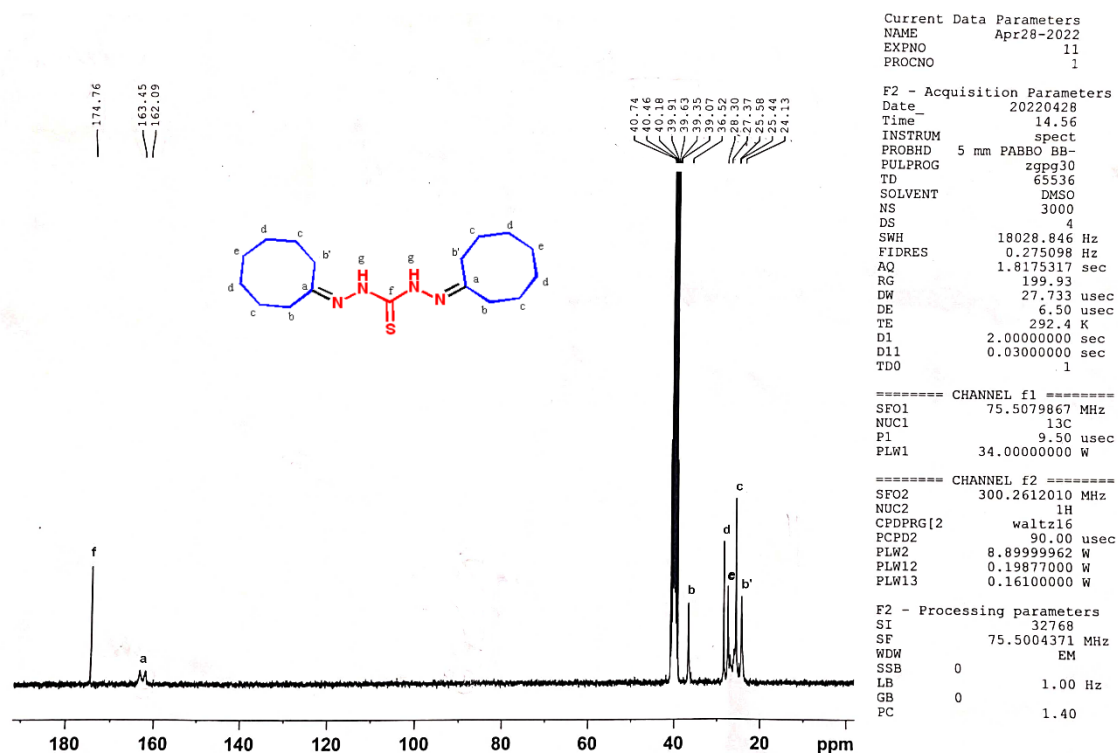

**Supplementary Fig. S3**  $^{13}\text{C}$ -NMR spectrum of compound **3**.

**UV  $\lambda_{\text{max}}$  (Methanol): 285 nm, FT-IR using KBr pellets ( $\text{cm}^{-1}$ ): 3302 and 3215 (-NH stretching), 2926 and 2849 (-CH<sub>2</sub> stretching), 1506 (N-H bending), 1460 (C-N stretching), 1219 (-C=S stretching) & 1113 (C-N bending),  $^1\text{H}$ -NMR (DMSO-*d*<sub>6</sub>, 300 MHz)  $\delta$  (ppm): 1.041-1.705 (m for 20H on C<sub>c</sub>-C<sub>e</sub>), 2.357 (s for 4H on C<sub>b</sub>) & 10.457 [s for 2H on N-H (denoted by g)].  $^{13}\text{C}$ -NMR (DMSO-*d*<sub>6</sub>, 75 MHz)  $\delta$  (ppm): 24.13, 25.44, 27.37, 28.30, 36.52, 162.09 & 174.76.**

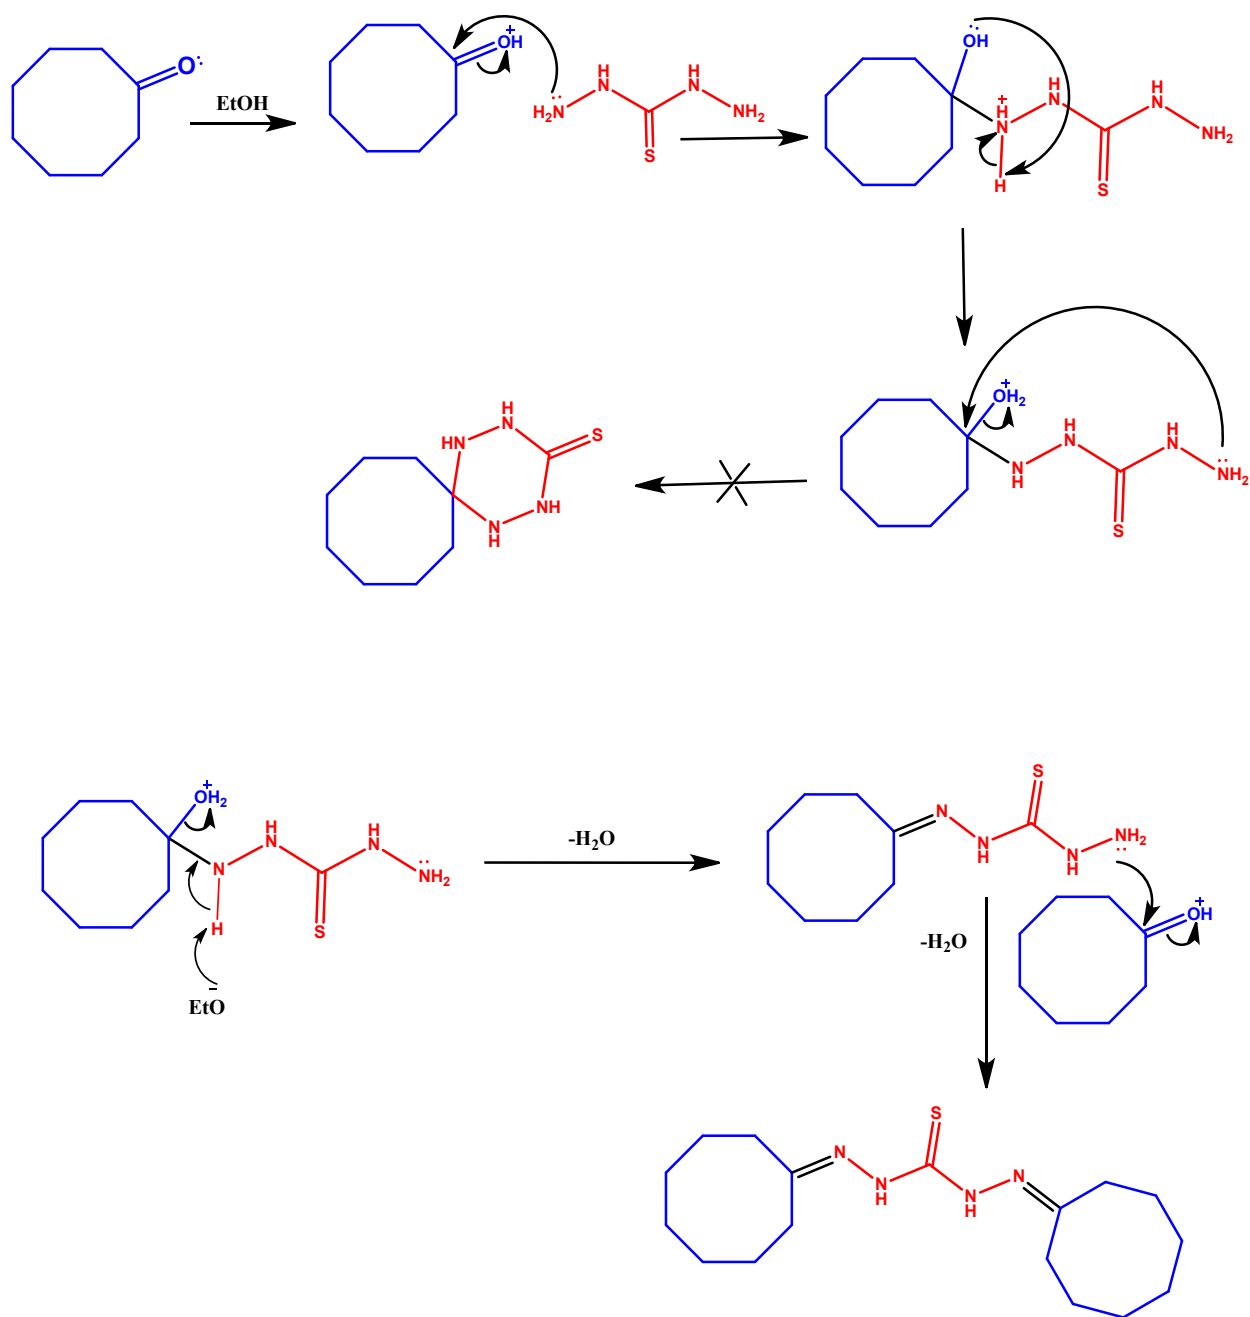

**Supplementary Fig. S4** Plausible reaction mechanism of synthesized compound 3.

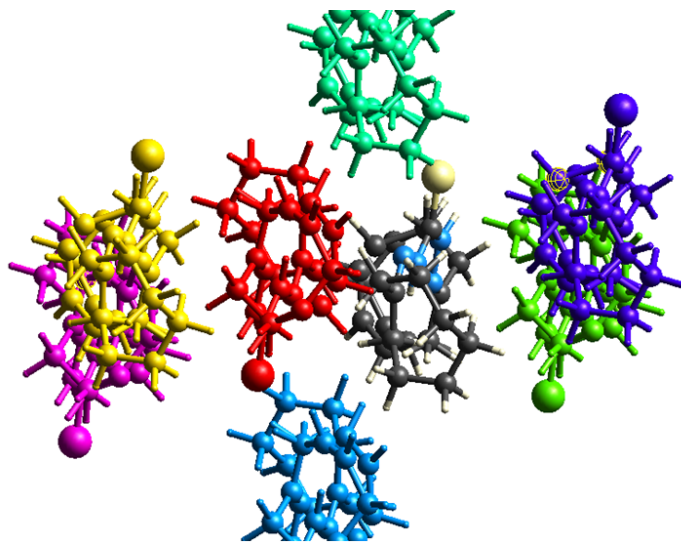

**Supplementary Fig. S5** A collection of molecules surrounds the central molecule (black colour).

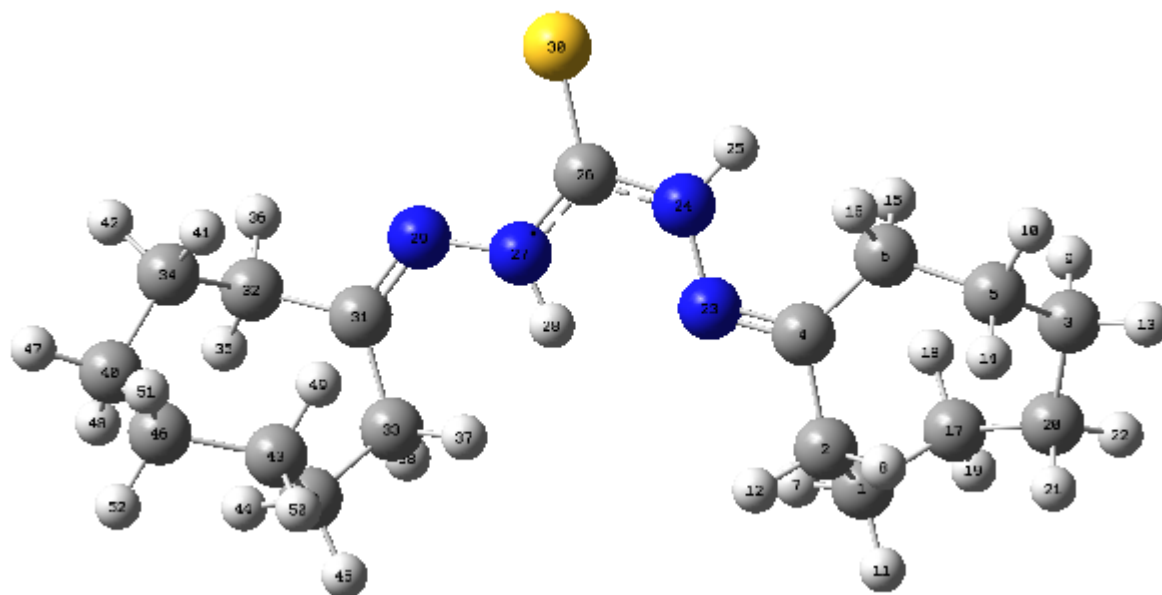

**Supplementary Fig. S6** Optimized structure of compound **3** using DFT/B3LYP/6-311++G (d, p) level of theory.

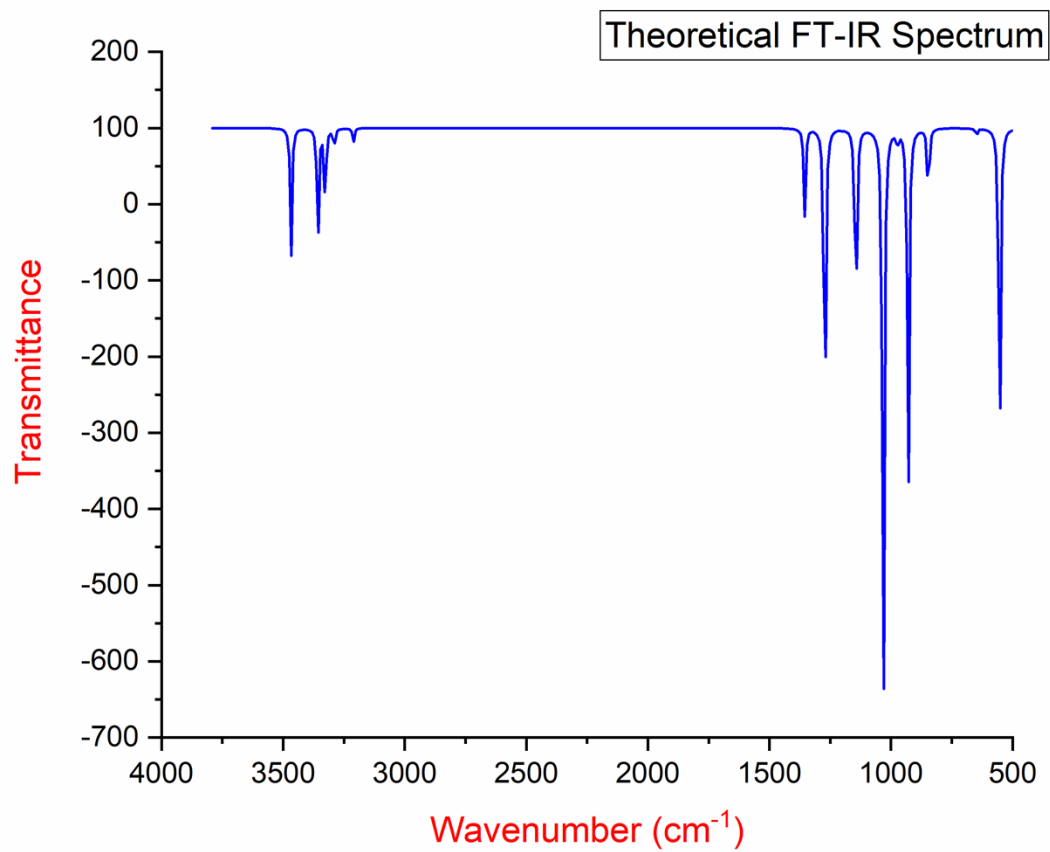

**Supplementary Fig. S7** Theoretical FT- IR spectrum of compound **3** using DFT/B3LYP/6-311++G (d, p) level of theory.

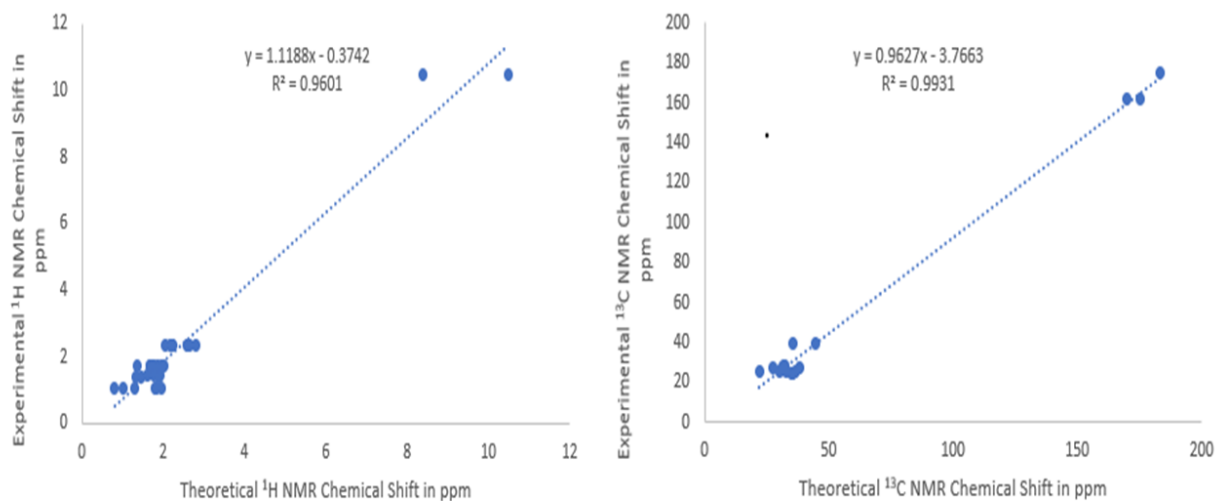

**Supplementary Fig. S8**  $^1\text{H}$  and  $^{13}\text{C}$  NMR correlation diagram of compound **3** using DFT/B3LYP/6-311++G (d, p) level of theory.

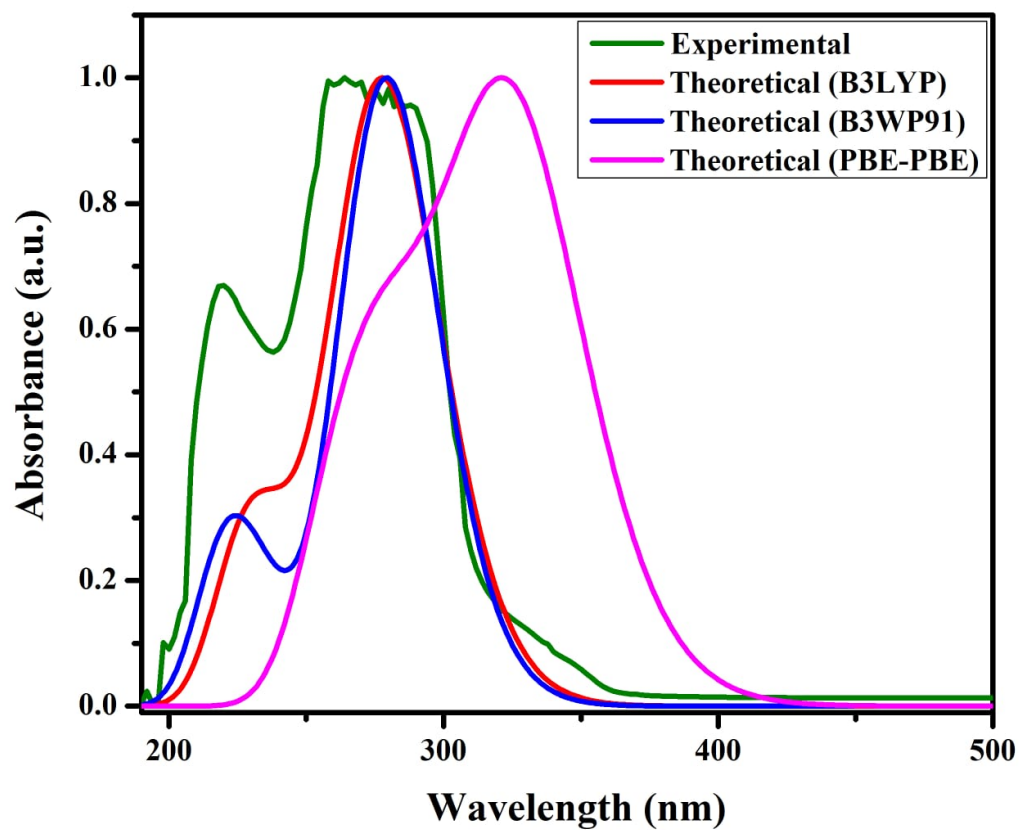

**Supplementary Fig. S9** The correlation diagram of UV- Vis spectra of compound **3** using DFT/B3LYP/B3WP91/PBE-PBE/6-311++G (d, p) level of theory.

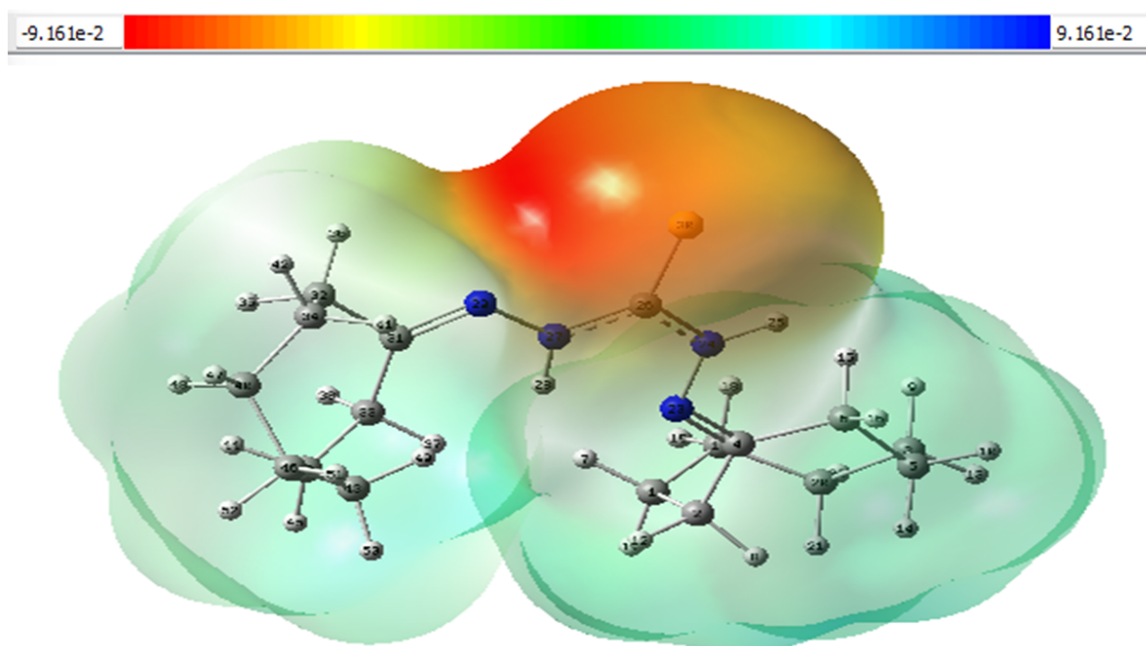

**Supplementary Fig. S10** The MEP diagram of compound **3** using DFT/B3LYP /6-311++G (d, p) level of theory

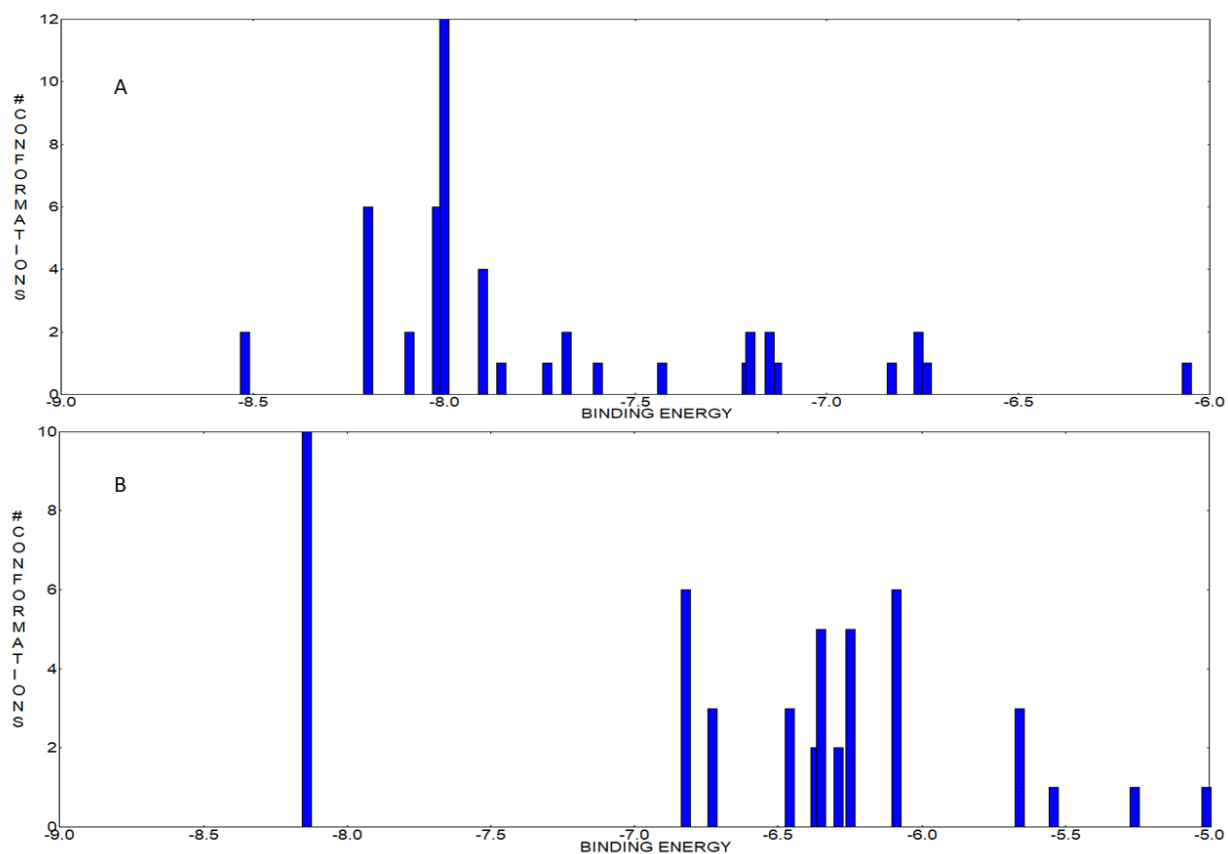

**Supplementary Fig. S11** The Histograms of compound **3** with protein tyrosine-protein phosphatase 4XR8(A) and 7VZE (B) found number of distinct conformational clusters 12 and 10 with binding energies out of 50 runs using a RMSD-tolerance of 2.0 Å.
