# Supplementary material for: Synthesis, crystal structure analysis, computational modelling and evaluation of anti-cervical cancer activity of novel 1,5-dicyclooctyl thiocarbohydrazone
Source: Royal Society of Chemistry journal article supplement (doi:10.1039/d4cp02286f), 2024-01-01
Supplement: d4cp02286f2.pdf [file d4cp02286f2.pdf]

## Synthesis, Crystal Structure Analysis, Computational Modelling and Evaluation of Anti-Cervical Cancer Activity of Novel 1,5-Dicyclooctyl Thiocarbohydrazone

*Soni Shukla<sup>a</sup>, Prince Trivedi<sup>a</sup>, Delna Johnson<sup>b</sup>, Pulkit Sharma<sup>a</sup>, Abhinav Jha<sup>a</sup>, Habiba Khan<sup>c</sup>,  
Vijay Thiruvengatam<sup>b</sup>, Monisha Banerjee<sup>c</sup>, Abha Bishnoi<sup>a\*</sup>*

<sup>a</sup>Department of Chemistry, University of Lucknow, Lucknow - 226007, Uttar Pradesh, India

<sup>b</sup>Department of Biological Sciences and Engineering, Indian Institute of Technology, Gandhinagar, Palaj -382355, Gandhinagar, India

<sup>c</sup>Department of Zoology, University of Lucknow, Lucknow- 226007, Uttar Pradesh, India

Corresponding Author: Prof. Abha Bishnoi, [Email: abhabishnoi5@gmail.com](mailto:abhabishnoi5@gmail.com), Mobile: 9415028822.

**Supplementary Table S1** Percentage of all the contact interactions involved in the supramolecular arrangement

**Supplementary Table S2** Enrichment Ratio of Chemical Species of **3**

**Supplementary Table S3** Interaction energies (kJ/mol) and Symop of the molecular pairs calculated from energy framework calculation of compound **3**

**Supplementary Table S4** EPINET representation for Topology of Crystal **3**

**Supplementary Table S5** The Total Energy of optimized structure at 6-311++G(d,p) basis set

**Supplementary Table S6** Experimental and Calculated Bond length and Bond Angle for compound **3**

**Supplementary Table S7** Experimental and calculated <sup>1</sup>H NMR and <sup>13</sup>C NMR chemical shifts of the compound **3** using B3LYP/6-311++G (d, p) level of theory

**Supplementary Table S8** Experimental and theoretical absorption wavelengths  $\lambda$  (nm), excitation energies E (eV) and oscillation Constants (f) of **3** using B3LYP/B3WP91/PBE-PBE/6-311++G (d, p) level of theory

**Supplementary Table S9** Calculated Polarizability ( $|\alpha_0|$ ), Anisotropy of Polarizability ( $\Delta\alpha$ ) and First Hyperpolarizability ( $\beta_0$ ) for **3**

**Supplementary Table S10** NBO of **3** at 6-311++G(d,p) level of theory

**Supplementary Table S11** The Physicochemical Properties and Drug likeness properties of synthesized compound **3** (calculated using Admetlab2.0 software)

**Supplementary Table S12** The summary of binding affinities (kcal/mol), Inhibition constant, Van der Waals interactions, Hydrophobic and the H-bond as hydrophilic interactions

**Supplementary Table S1** Percentage of all the contact interactions involved in the supramolecular arrangement

| Contacts        | Compound 3 |
|-----------------|------------|
| H···H/H...H (%) | 68.5       |
| C···H (%)       | 7.5        |
| N···H (%)       | 8.4        |
| S···H (%)       | 12.7       |
| C···C (%)       | 1.9        |

**Supplementary Table S2** Enrichment Ratio of Chemical Species of **3**

| Contact%              |      |      |      |      |      |
|-----------------------|------|------|------|------|------|
| Inside / Outside Atom | N    | H    | S    | C    |      |
| C                     | 0.4  | 3.2  | -    | 1.9  | 5.4  |
| H                     | 2.5  | 68.5 | 4.5  | 4.4  | 81.3 |
| N                     | 0.2  | 4.4  | -    | 0.4  | 5.0  |
| S                     | -    | 8.3  | -    | -    | 8.3  |
| Surface%              | 4.7  | 84.3 | 4.5  | 6.6  |      |
| Random Contact %      |      |      |      |      |      |
|                       | N    | H    | S    | C    |      |
| C                     | -    | 3.2  | -    | 1.9  | 5.1  |
| H                     | 4.4  | 68.5 | 8.3  | 3.2  | 84.4 |
| N                     | 0.2  | 4.0  | -    | 0.4  | 4.6  |
| S                     | -    | 4.5  | -    | -    | 4.5  |
|                       | 4.6  | 80.2 | 8.3  | 5.5  |      |
| Enrichment Ratio      |      |      |      |      |      |
|                       | N    | H    | S    | C    |      |
| C                     | -    | 1    | -    | 1    |      |
| H                     | 0.56 | 1    | 0.54 | 1.37 |      |

|   |   |      |   |   |  |
|---|---|------|---|---|--|
| N | 1 | 1.1  | - | 1 |  |
| S | - | 1.84 | - | - |  |

**Supplementary Table S3** Interaction energies (kJ/mol) and Symop of the molecular pairs calculated from energy framework calculation of compound **3**

|  | N | Symop      | R     | Electron Density | E_ele | E_pol | E_dis | E_rep | E_tot |
|--|---|------------|-------|------------------|-------|-------|-------|-------|-------|
|  | 1 | -x, -y, -z | 6.12  | B3LYP/6-31G(d,p) | -29.2 | -9.8  | -98.6 | 51.2  | -92.2 |
|  | 1 | x, y, z    | 10.81 | B3LYP/6-31G(d,p) | 1.4   | -0.3  | -1.9  | 0.0   | -0.5  |
|  | 1 | -x, -y, -z | 5.10  | B3LYP/6-31G(d,p) | -36.0 | -15.8 | -84.5 | 72.7  | -78.5 |
|  | 1 | x, y, z    | 7.09  | B3LYP/6-31G(d,p) | -28.9 | -12.1 | -52.6 | 64.9  | -45.3 |
|  | 1 | -x, -y, -z | 8.01  | B3LYP/6-31G(d,p) | -0.7  | -3.1  | -42.5 | 26.2  | -23.9 |
|  | 1 | x, y, z    | 12.55 | B3LYP/6-31G(d,p) | 9.5   | -1.0  | -23.5 | 0.0   | -11.1 |
|  | 1 | -x, -y, -z | 11.43 | B3LYP/6-31G(d,p) | -1.5  | -0.1  | -2.5  | 0.0   | -3.8  |

**Supplementary Table S4** EPINET representation for Topology of Crystal **3**

| Atom | CN | Sp | vdW | Hb | Composition |
|------|----|----|-----|----|-------------|
| S1   | 1  | 0  | 9   | 0  | C1          |
| N1   | 3  | 0  | 0   | 0  | H1C1N1      |
| H1   | 1  | 0  | 6   | 0  | N1          |
| N2   | 3  | 0  | 3   | 0  | H1C1N1      |
| H2   | 1  | 0  | 7   | 0  | N1          |

|     |   |   |   |   |        |
|-----|---|---|---|---|--------|
| N3  | 3 | 0 | 2 | 0 | H1C1N1 |
| H3  | 1 | 0 | 4 | 0 | N1     |
| N4  | 3 | 0 | 1 | 0 | H1C1N1 |
| H4  | 1 | 0 | 5 | 0 | N1     |
| C1  | 3 | 0 | 1 | 0 | C2N1   |
| C2  | 3 | 0 | 3 | 0 | N2S1   |
| C3  | 3 | 0 | 2 | 0 | C2N1   |
| C4  | 4 | 0 | 0 | 0 | H2C2   |
| H5  | 1 | 0 | 8 | 0 | C1     |
| H6  | 1 | 0 | 7 | 0 | C1     |
| C5  | 4 | 0 | 0 | 0 | H2C2   |
| H7  | 1 | 0 | 8 | 0 | C1     |
| H8  | 1 | 0 | 6 | 0 | C1     |
| C6  | 4 | 0 | 0 | 0 | H2C2   |
| H9  | 1 | 0 | 6 | 0 | C1     |
| H10 | 1 | 0 | 5 | 0 | C1     |
| C7  | 4 | 0 | 0 | 0 | H2C2   |
| H11 | 1 | 0 | 7 | 0 | C1     |
| H12 | 1 | 0 | 7 | 0 | C1     |
| C8  | 4 | 0 | 0 | 0 | H2C2   |
| H13 | 1 | 0 | 6 | 0 | C1     |
| H14 | 1 | 0 | 4 | 0 | C1     |
| C9  | 4 | 0 | 0 | 0 | H2C2   |
| H15 | 1 | 0 | 6 | 0 | C1     |
| H16 | 1 | 0 | 8 | 0 | C1     |
| C10 | 4 | 0 | 0 | 0 | H2C2   |
| H17 | 1 | 0 | 6 | 0 | C1     |
| H18 | 1 | 0 | 8 | 0 | C1     |
| C11 | 4 | 0 | 0 | 0 | H2C2   |
| H19 | 1 | 0 | 7 | 0 | C1     |

|     |   |   |   |   |      |
|-----|---|---|---|---|------|
| H20 | 1 | 0 | 6 | 0 | C1   |
| C12 | 4 | 0 | 0 | 0 | H2C2 |
| H21 | 1 | 0 | 6 | 0 | C1   |
| H22 | 1 | 0 | 6 | 0 | C1   |
| C13 | 4 | 0 | 0 | 0 | H2C2 |
| H23 | 1 | 0 | 7 | 0 | C1   |
| H24 | 1 | 0 | 6 | 0 | C1   |
| C14 | 4 | 0 | 0 | 0 | H2C2 |
| H25 | 1 | 0 | 9 | 0 | C1   |
| H26 | 1 | 0 | 7 | 0 | C1   |
| C15 | 4 | 0 | 0 | 0 | H2C2 |
| H27 | 1 | 0 | 5 | 0 | C1   |
| H28 | 1 | 0 | 7 | 0 | C1   |
| C16 | 4 | 0 | 0 | 0 | H2C2 |
| H29 | 1 | 0 | 7 | 0 | C1   |
| H30 | 1 | 0 | 7 | 0 | C1   |
| C17 | 4 | 0 | 0 | 0 | H2C2 |
| H31 | 1 | 0 | 7 | 0 | C1   |
| H32 | 1 | 0 | 7 | 0 | C1   |

| <b>Supplementary Table S5</b> The Total Energy of optimized structure at 6-311++G(d,p) basis set |              |
|--------------------------------------------------------------------------------------------------|--------------|
| Zero-point correction (Hartree/Particle)                                                         | 0.461436     |
| Thermal correction to Energy                                                                     | 0.484133     |
| Thermal correction to Enthalpy                                                                   | 0.485077     |
| Thermal correction to Gibbs Free Energy                                                          | 0.407646     |
| Sum of electronic and zero-point Energies                                                        | -1282.841819 |
| Sum of electronic and thermal Energies                                                           | -1282.819122 |
| Sum of electronic and thermal Enthalpies                                                         | -1282.818178 |
| Sum of electronic and thermal Free Energies                                                      | -1282.895608 |
| Total entropy Cal/Mol-Kelvin                                                                     | 162.967      |

| <b>Supplementary Table S6</b> Experimental and Calculated Bond length and Bond Angle for compound <b>3</b> |              |            |          |              |            |
|------------------------------------------------------------------------------------------------------------|--------------|------------|----------|--------------|------------|
| Atom No.                                                                                                   | Experimental | Calculated | Atom No. | Experimental | Calculated |

|          | Bond length<br>( Å ) | Bond<br>length ( Å ) |               | Bond Angle<br>( ° ) | Bond<br>Angle ( ° ) |
|----------|----------------------|----------------------|---------------|---------------------|---------------------|
| N1 H1    | 0.84                 | 1.0124               | H1 N1 N2      | 123                 | 122.826             |
| N1 N2    | 1.385                | 1.374                | H1 N1 C17     | 117                 | 116.3242            |
| N1 C17   | 1.345                | 1.366                | N2 N1 C17     | 120.2               | 120.8322            |
| S1 C17   | 1.669                | 1.6936               | N1 N2 C1      | 116.9               | 118.9155            |
| N2 C1    | 1.28                 | 1.2884               | H3 N3 N4      | 124                 | 122.1938            |
| N3 H3    | 0.83                 | 1.0171               | H3 N3 C17     | 117                 | 115.4391            |
| N3 N4    | 1.383                | 1.3706               | N4 N3 C17     | 118.5               | 122.278             |
| N3 C17   | 1.353                | 1.3506               | N3 N4 C9      | 119.3               | 118.9836            |
| N4 C9    | 1.278                | 1.2878               | N2 C1 C8      | 112.8               | 115.4715            |
| C1 C8    | 1.513                | 1.5162               | N2 C1 C2      | 126                 | 122.6909            |
| C1 C2    | 1.509                | 1.5078               | C8 C1 C2      | 121.1               | 121.8358            |
| C8 H8A   | 0.97                 | 1.099                | C1 C8 H8A     | 108.7               | 109.4941            |
| C8 H8B   | 0.97                 | 1.0987               | C1 C8 H8B     | 108.7               | 108.3703            |
| C8 C7    | 1.52                 | 1.5404               | C1 C8 C7      | 114.3               | 113.4488            |
| C9 C10   | 1.5                  | 1.5164               | H8A C8 H8B    | 107.6               | 107.0553            |
| C9 C16   | 1.503                | 1.5156               | H8A C8 C7     | 108.7               | 109.7681            |
| C10 H10A | 0.97                 | 1.0954               | H8B C8 C7     | 108.7               | 108.4918            |
| C10 H10B | 0.97                 | 1.0916               | N4 C9 C10     | 125.4               | 126.167             |
| C10 C11  | 1.524                | 1.5563               | N4 C9 C16     | 115.4               | 114.2921            |
| C11 H11C | 0.97                 | 1.0956               | C10 C9 C16    | 119.2               | 119.4761            |
| C11 H11D | 0.97                 | 1.0941               | C9 C10 H10A   | 108.6               | 111.1511            |
| C11 C19  | 1.605                | 1.5414               | C9 C10 H10B   | 108.6               | 107.6463            |
| C16 H16C | 0.97                 | 1.0926               | C9 C10 C11    | 114.4               | 114.1954            |
| C16 H16D | 0.97                 | 1.0978               | H10A C10 H10B | 107.6               | 106.2757            |
| C16 C18  | 1.497                | 1.5397               | H10A C10 C11  | 108.7               | 107.5832            |
| C2 H2A   | 0.97                 | 1.0917               | H10B C10 C11  | 108.7               | 109.7058            |
| C2 H2B   | 0.97                 | 1.0921               | C10 C11 H11C  | 108.9               | 109.5985            |
| C2 C3    | 1.518                | 1.5439               | C10 C11 H11D  | 108.8               | 107.6226            |
| C3 H3A   | 0.97                 | 1.0951               | C10 C11 C19   | 113.6               | 112.5814            |
| C3 H3B   | 0.97                 | 1.0959               | H11C C11 H11D | 107.7               | 105.6189            |
| C3 C4    | 1.516                | 1.5355               | H11C C11 C19  | 108.9               | 110.5219            |
| C4 H4A   | 0.97                 | 1.0968               | H11D C11 C19  | 108.9               | 110.6245            |
| C4 H4B   | 0.97                 | 1.0945               | C9 C16 H16C   | 108                 | 109.2952            |
| C4 C5    | 1.526                | 1.5447               | C9 C16 H16D   | 108                 | 106.2011            |
| C5 H5A   | 0.97                 | 1.0973               | C9 C16 C18    | 117.1               | 117.5291            |
| C5 H5B   | 0.97                 | 1.0948               | H16C C16 H16D | 107.3               | 106.8768            |
| C5 C6    | 1.529                | 1.5386               | H16C C16 C18  | 108                 | 108.9819            |
| C6 H6A   | 0.97                 | 1.0979               | H16D C16 C18  | 108                 | 107.4286            |
| C6 H6B   | 0.97                 | 1.0958               | N1 C17 S1     | 125.1               | 126.6622            |
| C6 C7    | 1.52                 | 1.5392               | N1 C17 N3     | 114                 | 113.8967            |
| C7 H7A   | 0.97                 | 1.0944               | S1 C17 N3     | 120.9               | 119.4405            |
| C7 H7B   | 0.97                 | 1.0947               | C1 C2 H2A     | 108.1               | 108.7937            |
| C18 H18  | 0.93                 | 1.0923               | C1 C2 H2B     | 108.1               | 106.5046            |

|          |      |        |              |       |          |
|----------|------|--------|--------------|-------|----------|
| C18 C21  | 1.4  | 1.547  | C1 C2 C3     | 116.7 | 119.1771 |
| C19 H19A | 0.93 | 1.0953 | H2A C2 H2B   | 107.3 | 105.3956 |
| C19 C20  | 0.92 | 1.5408 | H2A C2 C3    | 108.1 | 108.4825 |
| C20 H19B | 0.93 | 1.0963 | H2B C2 C3    | 108.1 | 107.647  |
| C20 C21  | 1.52 | 1.5372 | C2 C3 H3A    | 108.5 | 105.8898 |
| C21 H21  | 0.93 | 1.0959 | C2 C3 H3B    | 108.5 | 110.4482 |
|          |      |        | C2 C3 C4     | 114.9 | 117.2087 |
|          |      |        | H3A C3 H3B   | 107.5 | 105.3302 |
|          |      |        | H3A C3 C4    | 108.5 | 106.8208 |
|          |      |        | H3B C3 C4    | 108.5 | 110.3106 |
|          |      |        | C3 C4 H4A    | 108.3 | 108.529  |
|          |      |        | C3 C4 H4B    | 108.3 | 106.9005 |
|          |      |        | C3 C4 C5     | 116.3 | 118.8068 |
|          |      |        | H4A C4 H4B   | 107.4 | 105.7923 |
|          |      |        | H4A C4 C5    | 108.2 | 108.64   |
|          |      |        | H4B C4 C5    | 108.2 | 107.4316 |
|          |      |        | C4 C5 H5A    | 108.4 | 109.6039 |
|          |      |        | C4 C5 H5B    | 108.4 | 106.6437 |
|          |      |        | C4 C5 C6     | 115.4 | 116.2219 |
|          |      |        | H5A C5 H5B   | 107.5 | 105.5244 |
|          |      |        | H5A C5 C6    | 108.4 | 109.8232 |
|          |      |        | H5B C5 C6    | 108.4 | 108.4396 |
|          |      |        | C5 C6 H6A    | 108.6 | 109.4468 |
|          |      |        | C5 C6 H6B    | 108.5 | 109.118  |
|          |      |        | C5 C6 C7     | 114.9 | 115.4221 |
|          |      |        | H6A C6 H6B   | 107.6 | 105.419  |
|          |      |        | H6A C6 C7    | 108.6 | 109.8507 |
|          |      |        | H6B C6 C7    | 108.5 | 107.0892 |
|          |      |        | C8 C7 C6     | 116.1 | 116.1024 |
|          |      |        | C8 C7 H7A    | 108.3 | 108.3221 |
|          |      |        | C8 C7 H7B    | 108.3 | 107.5323 |
|          |      |        | C6 C7 H7A    | 108.3 | 108.8316 |
|          |      |        | C6 C7 H7B    | 108.3 | 109.0759 |
|          |      |        | H7A C7 H7B   | 107.4 | 106.5698 |
|          |      |        | C16 C18 H18  | 114.5 | 109.4081 |
|          |      |        | C16 C18 C21  | 130.9 | 117.1189 |
|          |      |        | H18 C18 C21  | 114.6 | 110.7488 |
|          |      |        | C11 C19 H19A | 110.6 | 109.1677 |
|          |      |        | C11 C19 C20  | 138.8 | 114.7776 |
|          |      |        | H19A C19 C20 | 110.6 | 108.542  |
|          |      |        | C19 C20 H19B | 109   | 108.5177 |
|          |      |        | C19 C20 C21  | 143   | 116.1679 |
|          |      |        | H19B C20 C21 | 108.6 | 108.948  |
|          |      |        | C18 C21 C20  | 122.2 | 117.3509 |
|          |      |        | C18 C21 H21  | 119   | 108.157  |

|  |  |  |             |     |          |
|--|--|--|-------------|-----|----------|
|  |  |  | C20 C21 H21 | 119 | 107.0797 |
|--|--|--|-------------|-----|----------|

**Supplementary Table S7** Experimental and calculated  $^1\text{H}$  NMR and  $^{13}\text{C}$  NMR chemical shifts of the compound **3** using B3LYP/6-311++G (d, p) level of theory

| $^{13}\text{C}$ NMR |             |        | $^1\text{H}$ NMR |             |        |
|---------------------|-------------|--------|------------------|-------------|--------|
| Atom no.            | Theoretical | Exp.   | Atom no.         | Theoretical | Exp.   |
| 1 C                 | 36.6775     | 25.44  | 7 H              | 1.676       | 1.705  |
| 2 C                 | 35.4962     | 24.13  | 8 H              | 2.8195      | 2.357  |
| 3 C                 | 38.2264     | 27.37  | 9 H              | 1.29        | 1.041  |
| 4 C                 | 169.895     | 162.09 | 10 H             | 1.9447      | 1.705  |
| 5 C                 | 30.0475     | 25.44  | 11 H             | 1.6842      | 1.705  |
| 6 C                 | 35.5826     | 39.07  | 12 H             | 2.2161      | 2.357  |
| 17 C                | 31.0713     | 27.37  | 13 H             | 1.967       | 1.062  |
| 20 C                | 32.4473     | 28.30  | 14 H             | 1.8669      | 1.705  |
| 26 C                | 183.5211    | 174.76 | 15 H             | 2.2358      | 2.357  |
| 31 C                | 175.3121    | 162.09 | 16 H             | 2.5824      | 2.357  |
| 32 C                | 44.7006     | 39.07  | 18 H             | 1.0343      | 1.041  |
| 33 C                | 34.7827     | 24.13  | 19 H             | 1.8294      | 1.062  |
| 34 C                | 33.0444     | 25.44  | 21 H             | 1.3201      | 1.364  |
| 39 C                | 22.0254     | 25.44  | 22 H             | 1.9153      | 1.467  |
| 40 C                | 32.0641     | 27.37  | 25 H             | 8.3732      | 10.457 |
| 43 C                | 27.7191     | 27.37  | 28 H             | 10.4774     | 10.457 |
| 46 C                | 31.6434     | 28.30  | 35 H             | 2.1942      | 2.357  |
|                     |             |        | 36 H             | 2.6294      | 2.357  |
|                     |             |        | 37 H             | 2.6341      | 2.357  |
|                     |             |        | 38 H             | 2.0659      | 2.357  |
|                     |             |        | 41 H             | 1.3753      | 1.705  |
|                     |             |        | 42 H             | 2.0327      | 1.705  |
|                     |             |        | 44 H             | 1.7841      | 1.705  |
|                     |             |        | 45 H             | 1.7275      | 1.705  |
|                     |             |        | 47 H             | 1.8931      | 1.364  |
|                     |             |        | 48 H             | 1.7678      | 1.467  |
|                     |             |        | 49 H             | 0.8135      | 1.041  |
|                     |             |        | 50 H             | 1.7935      | 1.062  |
|                     |             |        | 51 H             | 1.4513      | 1.364  |
|                     |             |        | 52 H             | 1.6116      | 1.467  |

**Supplementary Table S8** Experimental and theoretical absorption wavelengths  $\lambda$  (nm), excitation energies E (eV) and oscillation Constants (f) of **3** using long range functional and 6-311++G (d, p) basis set



| <i>S. No</i>            | <i>Excitation</i> | <i>Energy (eV)</i> | <i>Wave Length (nm)</i> | <i>Oscillation Constant (f)</i> | <i>Contribution of probable transition (%)</i> | <i>Assignment</i> | <i>Observed</i> |
|-------------------------|-------------------|--------------------|-------------------------|---------------------------------|------------------------------------------------|-------------------|-----------------|
| B3LYP/6-311++G (d, p)   |                   |                    |                         |                                 |                                                |                   |                 |
| 1.                      | H-2 → L           | 4.5340             | 273.45                  | 0.6544                          | 49.14                                          | $\pi - \pi^*$     | 274 nm          |
| B3WP91/6-311++G (d, p)  |                   |                    |                         |                                 |                                                |                   |                 |
| 1.                      | H-2 → L           | 4.4883             | 276.24                  | 0.6075                          | 48.57                                          | $\pi - \pi^*$     | 274 nm          |
| PBE-PBE/6-311++G (d, p) |                   |                    |                         |                                 |                                                |                   |                 |
| 1.                      | H-2 → L           | 3.8307             | 323.66                  | 0.3790                          | 45.52                                          | $\pi - \pi^*$     | 274 nm          |

**Supplementary Table S9** Calculated Polarizability ( $\alpha_0$ ), Anisotropy of Polarizability ( $\Delta\alpha$ ) and First Hyperpolarizability ( $\beta_0$ ) for **3**

| Dipole moment |         | Polarizability |             | Hyperpolarizability |         |
|---------------|---------|----------------|-------------|---------------------|---------|
| $\mu_x$       | -3.7089 | $\alpha_{xx}$  | 426.678     | $\beta_{xxx}$       | 362.426 |
| $\mu_y$       | -8.4708 | $\alpha_{yy}$  | 8.2670      | $\beta_{yyy}$       | 795.543 |
| $\mu_z$       | -0.239  | $\alpha_{zz}$  | 385.791     | $\beta_{zzz}$       | -426.87 |
| $\mu$         | 9.5511  | $\alpha_{xy}$  | 7.14686     | $\beta_{xyy}$       | 721.905 |
|               |         | $\alpha_{xz}$  | 33.0226     | $\beta_{xxy}$       | 52.2736 |
|               |         | $\alpha_{yz}$  | 285.655     | $\beta_{xxz}$       | -114.52 |
|               |         | $\alpha_0$     | 40.54436136 | $\beta_{xzz}$       | -474.65 |
|               |         | $\Delta\alpha$ | 59.2117873  | $\beta_{yzz}$       | -3.6363 |
|               |         |                |             | $\beta_{yyz}$       | -21.14  |
|               |         |                |             | $\beta_{xyz}$       | 87.6668 |
|               |         |                |             | $\beta_0$           | 10.2251 |

**Supplementary Table S10** NBO of **3** at 6-311++G(d,p) level of theory

| <i>Donor (i)</i>                          |                                                               |                                                                  | <i>Acceptor (j)</i>                  |                                                                        |                                                                                           | <i>E<sup>(2)</sup></i><br><i>(kJ/mol)</i> |
|-------------------------------------------|---------------------------------------------------------------|------------------------------------------------------------------|--------------------------------------|------------------------------------------------------------------------|-------------------------------------------------------------------------------------------|-------------------------------------------|
| <i>orbital / lp</i><br><i>(occupancy)</i> | <i>ED<sub>A</sub></i><br><i>%</i><br><i>ED<sub>B</sub>, %</i> | <i>NBO hybrid</i><br><i>Orbitals</i>                             | <i>Orbital</i><br><i>(occupancy)</i> | <i>ED<sub>A</sub></i><br><i>%</i><br><i>ED<sub>B</sub></i><br><i>%</i> | <i>NBO hybrid</i><br><i>Orbitals</i>                                                      |                                           |
| $\sigma$ (C2-C4)<br>1.96980               | 49.47<br>50.53                                                | 0.7034 (sp <sup>2.59</sup> )C2<br>0.7108 (sp <sup>2.03</sup> )C4 | $\sigma^*$ (N23-<br>N24)<br>0.02685  | 54.32<br>45.68                                                         | 0.7370(sp <sup>3.51</sup> d <sup>0.01</sup> )N23<br>-0.6759(sp <sup>2.18</sup> )N24       | 6.37                                      |
| $\sigma$ (C6-H16)<br>1.97391              | 61.19<br>38.81                                                | 0.7822(sp <sup>3.46</sup> )C6<br>0.6230(sp <sup>0.00</sup> )H16  | $\sigma^*$ (C4-N23)<br>0.01935       | 60.52<br>39.48                                                         | 0.7780(sp <sup>2.18</sup> )C4<br>-0.6283(sp <sup>1.27</sup> )N23                          | 5.31                                      |
| $\sigma$ (N24-<br>H25)<br>1.98178         | 72.39<br>27.61                                                | 0.8508(sp <sup>2.29</sup> )N24<br>0.5254(sp <sup>0.00</sup> )H25 | $\pi^*$ (C26-<br>S52)<br>0.01600     | 41.09<br>58.91                                                         | 0.6410(sp <sup>1.65</sup> )C26<br>-0.7675(sp <sup>4.48</sup> d <sup>0.04</sup> )S52       | 5.74                                      |
| $\sigma$ (C26-<br>S52)<br>1.98582         | 23.98<br>76.02                                                | 0.4896(sp <sup>1.00</sup> )C26<br>0.8719(sp <sup>1.00</sup> )S52 | $\sigma^*$ (C26-<br>S52)<br>0.56574  | 76.02<br>23.98                                                         | 0.8719(sp <sup>1.00</sup> )C26<br>-0.4896(sp <sup>1.00</sup> )S52                         | 5.61                                      |
| $\sigma$ (C30-<br>C32)<br>1.97029         | 50.67<br>49.33                                                | 0.7118(sp <sup>2.00</sup> )C30<br>0.7024(sp <sup>2.60</sup> )C32 | $\sigma^*$ (N27-<br>N29)<br>0.03697  | 46.31<br>53.69                                                         | 0.6805(sp <sup>2.21</sup> )N27<br>-0.7327(sp <sup>3.52</sup> d <sup>0.01</sup> )N29       | 6.48                                      |
| $\sigma$ (C31-<br>H34)<br>1.97495         | 61.30<br>38.70                                                | 0.7829(sp <sup>3.44</sup> )C31<br>0.6221(sp <sup>0.00</sup> )H34 | $\sigma^*$ (N29-<br>C30)<br>0.01994  | 39.07<br>60.93                                                         | 0.6250(sp <sup>1.20</sup> )N29<br>-0.7806(sp <sup>2.19</sup> )C30                         | 5.37                                      |
| $\sigma$ (C32-<br>H37)<br>1.96179         | 60.81<br>39.19                                                | 0.7798(sp <sup>3.61</sup> )C32<br>0.6260(sp <sup>0.00</sup> )H37 | $\pi^*$ (N29-<br>C30)<br>0.16897     | 39.00<br>61.00                                                         | 0.6245(sp <sup>1.00</sup> )N29<br>-<br>0.7810(sp <sup>99.99</sup> d <sup>19.12</sup> )C30 | 5.47                                      |
| lp 1 (N23)<br>1.92546                     |                                                               | (sp <sup>1.95</sup> )N23                                         | $\sigma^*$ (C4-C6)<br>0.04182        | 50.22<br>49.78                                                         | 0.7087(sp <sup>1.81</sup> )C4<br>-0.7056(sp <sup>2.62</sup> )C6                           | 11.31                                     |
| lp 1 (N23)<br>1.92546                     |                                                               | (sp <sup>1.95</sup> )N23                                         | $\sigma^*$ (N24-<br>H25)<br>0.04955  | 27.61<br>72.39                                                         | 0.5254(sp <sup>2.29</sup> )N24<br>-0.8508(sp <sup>0.00</sup> )H25                         | 8.69                                      |

|                       |                                             |                                |                |                                                                                           |       |
|-----------------------|---------------------------------------------|--------------------------------|----------------|-------------------------------------------------------------------------------------------|-------|
| lp 1 (N24)<br>1.63180 | (sp <sup>1.00</sup> )N24                    | $\pi^*(C4-N23)$<br>0.15287     | 60.01<br>39.99 | 0.7747(sp <sup>99.99</sup> d <sup>19.26</sup> )C4<br>-0.6323(sp <sup>1.00</sup> )N23      | 22.28 |
| lp 1 (N24)<br>1.63180 | (sp <sup>1.00</sup> )N24                    | $\sigma^*(C26-S52)$<br>0.56574 | 76.02<br>23.98 | 0.8719(sp <sup>1.00</sup> )C26<br>-0.4896(sp <sup>1.00</sup> )S52                         | 84.81 |
| lp 1 (N25)<br>1.65297 | (sp <sup>1.00</sup> )N25                    | $\sigma^*(C26-S52)$<br>0.56574 | 76.02<br>23.98 | 0.8719(sp <sup>1.00</sup> )C26<br>-0.4896(sp <sup>1.00</sup> )S52                         | 75.11 |
| lp 1 (N25)<br>1.65297 | (sp <sup>1.00</sup> )N25                    | $\pi^*(N29-C30)$<br>0.16897    | 39.00<br>61.00 | 0.6245(sp <sup>1.00</sup> )N29<br>-<br>0.7810(sp <sup>99.99</sup> d <sup>19.12</sup> )C30 | 23.47 |
| lp 1 (N29)<br>1.91573 | (sp <sup>2.07</sup> )N29                    | $\sigma^*(N27-H28)$<br>0.03567 | 28.57<br>71.43 | 0.5345(sp <sup>2.31</sup> )N27<br>-0.8452(sp <sup>0.00</sup> )H28                         | 8.79  |
| lp 1 (N29)<br>1.91573 | (sp <sup>2.07</sup> )N29                    | $\sigma^*(C30-C31)$<br>0.04009 | 50.19<br>49.81 | 0.7085(sp <sup>1.84</sup> )C30<br>-0.7058(sp <sup>2.59</sup> )C31                         | 10.75 |
| lp 2 (S52)<br>1.89751 | (sp <sup>99.99</sup> d <sup>0.20</sup> )S52 | $\sigma^*(N24-C26)$<br>0.05491 | 38.19<br>61.81 | 0.6180(sp <sup>1.61</sup> )N24<br>-0.7862(sp <sup>2.15</sup> )C26                         | 12.31 |
| lp 2 (S52)<br>1.89751 | (sp <sup>99.99</sup> d <sup>0.20</sup> )S52 | $\sigma^*(C26-N27)$<br>0.04746 | 61.84<br>38.16 | 0.7864(sp <sup>2.25</sup> )C26<br>-0.6178(sp <sup>1.59</sup> )N27                         | 9.77  |



|      | <b>s</b>                                                                                                                           | <b>s</b>                                                                                                                                                                                               | <b>s</b>                                       |   | <b>c<br/>bonds</b> | <b>bonds</b> | <b>(<math>\mu</math>M)</b> |       |
|------|------------------------------------------------------------------------------------------------------------------------------------|--------------------------------------------------------------------------------------------------------------------------------------------------------------------------------------------------------|------------------------------------------------|---|--------------------|--------------|----------------------------|-------|
| 4xr8 | Gln 336<br>(A)<br>N2.....NE2<br>2.98 (Å)<br><br>Glu 382<br>(A)<br>N1.....O<br>2.75 (Å)                                             | Ile 179 (A),<br>Arg 383<br>(A),<br>Pro 335 (A)                                                                                                                                                         | Tyr 177<br>(A),<br>Ile 334 (A),<br>Gln 73 (A), | 2 | 3                  | 3            | 0.57                       | -8.52 |
| 7vze | Gly 535<br>(A)<br>N1.....O<br>2.65 (Å)<br><br>Met 540<br>(A)<br>N1.....O<br>2.82 (Å)<br><br>Met 540<br>(A)<br>N3.....O<br>2.88 (Å) | Lys 539<br>(A),<br>Glu 576<br>(A),<br>Pro 541<br>(A),<br>Gln 538<br>(A),<br>Gln 565<br>(A),<br>Val 567<br>(A),<br>Val 566<br>(A),<br>Ile 574 (A),<br>Val 542<br>(A),<br>His 577<br>(A),<br>Tyr 536 (A) | Ala 575 (A)                                    | 3 | 11                 | 1            | 1.08                       | -8.14 |
